# Supplementary material for: Human Embryonic Stem Cell Derived Mesenchymal Progenitors Express Cardiac Markers but Do Not Form Contractile Cardiomyocytes
Source: PLoS One. 2013 Jan 16;8(1):e54524. doi: 10.1371/journal.pone.0054524 (PMC3546995; doi:10.1371/journal.pone.0054524)
Supplement: Table S1. — (XLSX) [file pone.0054524.s007.xlsx]

## Sheet: ESMP vs BM
Genes overexpressed in BM-MPs compared to hESC-MPs
Gene Symbol	Gene Title	RefSeq Transcript ID	p-value	Fold-Change
CLDN11	claudin 11	NM_005602	1.35145e-12	-211.704
KCTD12	potassium channel tetramerisation domain containing 12	NM_138444	2.14765e-11	-196.175
MEST	mesoderm specific transcript homolog (mouse)	NM_002402 /// NM_177524 /// NM_177525	1.4624e-14	-195.485
KIAA1199	KIAA1199	NM_018689	5.64666e-14	-148.31
CYP1B1	cytochrome P450, family 1, subfamily B, polypeptide 1	NM_000104	2.5359e-13	-87.0533
PDGFRA	platelet-derived growth factor receptor, alpha polypeptide	NM_006206	1.75636e-14	-86.8859
CYP1B1	cytochrome P450, family 1, subfamily B, polypeptide 1	NM_000104	1.62683e-12	-84.7799
SLC14A1	solute carrier family 14 (urea transporter), member 1 (Kidd blood group)	NM_001128588 /// NM_001146036 /// NM_001146037 /// NM_015865	9.75545e-17	-77.7835
CHI3L1	chitinase 3-like 1 (cartilage glycoprotein-39)	NM_001276	5.76994e-12	-69.8473
C10orf116	chromosome 10 open reading frame 116	NM_006829	7.95329e-14	-67.3777
CYP1B1	cytochrome P450, family 1, subfamily B, polypeptide 1	NM_000104	1.31613e-15	-67.2692
TNFRSF11B	tumor necrosis factor receptor superfamily, member 11b	NM_002546	2.32249e-12	-66.5793
SCIN	scinderin	NM_001112706 /// NM_033128	8.62778e-09	-66.5442
TNFRSF11B	tumor necrosis factor receptor superfamily, member 11b	NM_002546	1.3209e-14	-65.3674
CAT	catalase	NM_001752	1.50912e-14	-62.9077
FGF7 /// KGFLP1 /// KGFLP2	fibroblast growth factor 7 (keratinocyte growth factor) /// keratinocyte growth	NM_002009 /// NR_003670 /// NR_003674	2.04632e-11	-58.9206
ALDH1A3	aldehyde dehydrogenase 1 family, member A3	NM_000693	1.88774e-08	-57.3499
FLG	filaggrin	NM_002016	3.93846e-12	-54.0515
QPCT	glutaminyl-peptide cyclotransferase	NM_012413	3.17251e-11	-53.3804
DNAJC15	DnaJ (Hsp40) homolog, subfamily C, member 15	NM_013238	3.94212e-08	-52.6139
KRTAP1-5	keratin associated protein 1-5	NM_031957	2.91541e-12	-50.4917
SLC14A1	solute carrier family 14 (urea transporter), member 1 (Kidd blood group)	NM_001128588 /// NM_001146036 /// NM_001146037 /// NM_015865	7.11168e-12	-48.8549
KCTD12	potassium channel tetramerisation domain containing 12	NM_138444	3.7084e-11	-45.9468
KRTAP1-1	keratin associated protein 1-1	NM_030967	7.18276e-15	-44.9568
VCAN	versican	NM_001126336 /// NM_001164097 /// NM_001164098 /// NM_004385	4.28819e-07	-43.6575
CHI3L1	chitinase 3-like 1 (cartilage glycoprotein-39)	NM_001276	9.59942e-12	-41.6503
CTSK	cathepsin K	NM_000396	1.20075e-11	-40.4053
ITGBL1	integrin, beta-like 1 (with EGF-like repeat domains)	NM_004791	9.22976e-15	-39.5048
SEPP1	selenoprotein P, plasma, 1	NM_001085486 /// NM_001093726 /// NM_005410	1.12018e-11	-39.364
ENPP2	ectonucleotide pyrophosphatase/phosphodiesterase 2	NM_001040092 /// NM_001130863 /// NM_006209	1.10212e-09	-39.1465
VCAN	versican	NM_001126336 /// NM_001164097 /// NM_001164098 /// NM_004385	4.76074e-07	-38.2124
IRX3	iroquois homeobox 3	NM_024336	2.40378e-12	-37.9427
IAH1	isoamyl acetate-hydrolyzing esterase 1 homolog (S. cerevisiae)	NM_001039613	7.16935e-14	-37.5417
ITGB8	integrin, beta 8	NM_002214	1.27665e-07	-34.5031
SCIN	scinderin	NM_001112706 /// NM_033128	3.40525e-08	-34.393
HAS2	hyaluronan synthase 2	NM_005328	1.00194e-06	-33.9852
FOXQ1	forkhead box Q1	NM_033260	1.20313e-12	-33.715
CBR1	carbonyl reductase 1	NM_001757	5.59667e-11	-32.6762
XG	Xg blood group	NM_001141919 /// NM_001141920 /// NM_175569	3.09829e-12	-32.6338
DNER	delta/notch-like EGF repeat containing	NM_139072	4.42578e-05	-31.6798
AKR1C3	aldo-keto reductase family 1, member C3 (3-alpha hydroxysteroid dehydrogenase, t	NM_003739	2.14166e-07	-30.0312
TSPYL5	TSPY-like 5	NM_033512	3.83347e-13	-29.8384
VCAN	versican	NM_001126336 /// NM_001164097 /// NM_001164098 /// NM_004385	1.99469e-07	-29.1173
HAS2	Hyaluronan synthase 2	NM_005328	2.57521e-07	-28.7852
ITGBL1	integrin, beta-like 1 (with EGF-like repeat domains)	NM_004791	3.80815e-15	-28.0754
CTHRC1	collagen triple helix repeat containing 1	NM_138455	4.20023e-11	-27.4428
LY6K	lymphocyte antigen 6 complex, locus K	NM_001160354 /// NM_001160355 /// NM_017527	2.06513e-10	-26.8564
TUSC1	tumor suppressor candidate 1	NM_001004125	1.38519e-10	-26.8003
ITGBL1	integrin, beta-like 1 (with EGF-like repeat domains)	NM_004791	1.85191e-14	-26.267
VCAN	versican	NM_001126336 /// NM_001164097 /// NM_001164098 /// NM_004385	3.88959e-07	-25.2668
COX7A1	cytochrome c oxidase subunit VIIa polypeptide 1 (muscle)	NM_001864	8.25817e-10	-24.2073
EPDR1	ependymin related protein 1 (zebrafish)	NM_017549	4.3505e-12	-24.0074
TMBIM4	transmembrane BAX inhibitor motif containing 4	NM_016056	1.84228e-10	-24.0021
FBXO32	F-box protein 32	NM_058229 /// NM_148177	1.90262e-11	-23.3231
ITGBL1	Integrin, beta-like 1 (with EGF-like repeat domains)	NM_004791	1.02486e-12	-23.2797
NFASC	neurofascin homolog (chicken)	NM_001005388 /// NM_001005389 /// NM_001160331 /// NM_001160332 /// NM_001160333	1.74079e-12	-23.0919
KRTAP1-3	keratin associated protein 1-3	NM_030966	4.85297e-10	-22.7775
SRGN	serglycin	NM_002727	1.76761e-11	-22.4132
COMT	catechol-O-methyltransferase	NM_000754 /// NM_001135161 /// NM_001135162 /// NM_007310	4.2339e-09	-22.1864
CAT	catalase	NM_001752	1.41797e-13	-22.1411
VCAN	versican	NM_001126336 /// NM_001164097 /// NM_001164098 /// NM_004385	5.23031e-07	-21.9951
FNDC1	fibronectin type III domain containing 1	NM_032532	1.82582e-11	-21.7239
AKR1C1	aldo-keto reductase family 1, member C1 (dihydrodiol dehydrogenase 1; 20-alpha)	NM_001353	1.25245e-06	-21.6486
FGF7	fibroblast growth factor 7 (keratinocyte growth factor)	NM_002009	8.54543e-13	-21.4694
ABCA8	ATP-binding cassette, sub-family A (ABC1), member 8	NM_007168	1.55108e-12	-20.9103
TMBIM4	transmembrane BAX inhibitor motif containing 4	NM_016056	5.51133e-11	-20.8167
AKR1C2	aldo-keto reductase family 1, member C2 (dihydrodiol dehydrogenase 2; bile acid	NM_001135241 /// NM_001354 /// NM_205845	7.18094e-08	-20.7373
TRIM4	tripartite motif-containing 4	NM_033017 /// NM_033091	1.85568e-13	-20.6653
KCNK2	potassium channel, subfamily K, member 2	NM_001017424 /// NM_001017425 /// NM_014217	1.74206e-12	-20.4145
ENPP2	ectonucleotide pyrophosphatase/phosphodiesterase 2	NM_001040092 /// NM_001130863 /// NM_006209	1.88669e-10	-20.0848
Genes overexpressed in hES-MPs compared to BM-MPs
Gene Symbol	Gene Title	RefSeq Transcript ID	p-value	Fold-Change
ACTG2	actin, gamma 2, smooth muscle, enteric	NM_001615	1.12376e-06	20.1916
KRT18	keratin 18	NM_000224 /// NM_199187	2.33513e-07	20.3202
MKX	mohawk homeobox	NM_173576	1.06525e-07	20.9307
CD24	CD24 molecule	NM_013230	6.3559e-07	20.9917
PKIB	protein kinase (cAMP-dependent, catalytic) inhibitor beta	NM_032471 /// NM_181794 /// NM_181795	3.19622e-11	21.1308
CD24	CD24 molecule	NM_013230	1.33077e-07	22.2492
CD24	CD24 molecule	NM_013230	6.5286e-07	22.4166
MYOCD	myocardin	NM_001146312 /// NM_001146313 /// NM_153604	9.69265e-10	24.0171
CTSC	cathepsin C	NM_001114173 /// NM_001814 /// NM_148170	6.20557e-10	30.062
ANXA3	annexin A3	NM_005139	1.51152e-08	30.6577
MXRA5	matrix-remodelling associated 5	NM_015419	1.21576e-06	31.2535
SCRG1	stimulator of chondrogenesis 1	NM_007281	7.64038e-06	31.2964
HOXD10	homeobox D10	NM_002148	4.12694e-12	36.5727
LHX9	LIM homeobox 9	NM_001014434 /// NM_020204	9.2958e-13	46.1309
LGR5	leucine-rich repeat-containing G protein-coupled receptor 5	NM_003667	0.000487452	48.8972
AFF3	AF4/FMR2 family, member 3	NM_001025108 /// NM_002285	2.83597e-12	48.9157
DSG2	desmoglein 2	NM_001943	2.10711e-14	49.9621
CYTL1	cytokine-like 1	NM_018659	2.24884e-09	50.2181
MAB21L2	mab-21-like 2 (C. elegans)	NM_006439	9.96594e-12	52.9615
SERPINB7	serpin peptidase inhibitor, clade B (ovalbumin), member 7	NM_001040147 /// NM_003784	3.33203e-15	58.0691
GABRB1	gamma-aminobutyric acid (GABA) A receptor, beta 1	NM_000812	3.1636e-14	162.383
